# Supplementary material for: SO2-Tolerant catalytic reduction of NOx by confining active species in TiO2 nanotubes
Source: Royal Society of Chemistry journal article supplement (doi:10.1039/d2en00144f), 2022-01-01
Supplement: d2en00144f1.pdf [file d2en00144f1.pdf]

*Electronic supplementary information (ESI)*

**SO<sub>2</sub>-Tolerant Catalytic Reduction of NO<sub>x</sub> via Confining Active Species in TiO<sub>2</sub> Nanotubes**

Ziqiang Xu,<sup>a</sup> Sarawoot Impeng,<sup>b</sup> Xinyu Jia,<sup>a</sup> Fuli Wang,<sup>a</sup> Yongjie Shen,<sup>a</sup> Penglu Wang,<sup>a,\*</sup> and Dongsong Zhang<sup>a,\*</sup>

<sup>a</sup> International Joint Laboratory of Catalytic Chemistry, Department of Chemistry, College of Sciences, Shanghai University, Shanghai 200444, P. R. China.

<sup>b</sup> National Nanotechnology Center, National Science and Technology Development Agency, Pathum Thani, 12120, Thailand.

\*E-mail: dszhang@shu.edu.cn; plwang@shu.edu.cn.

The Supporting Information includes 47 Pages, 29 Figures and 6 Tables.

## Table of Contents

|                                         |     |
|-----------------------------------------|-----|
| <b>Synthesis of Catalysts</b> .....     | S4  |
| <b>Catalysts Characterization</b> ..... | S6  |
| <b>DFT Calculations</b> .....           | S10 |
| <b>Figure S1</b> .....                  | S11 |
| <b>Figure S2</b> .....                  | S12 |
| <b>Figure S3</b> .....                  | S13 |
| <b>Figure S4</b> .....                  | S14 |
| <b>Figure S5</b> .....                  | S15 |
| <b>Figure S6</b> .....                  | S16 |
| <b>Figure S7</b> .....                  | S17 |
| <b>Figure S8</b> .....                  | S18 |
| <b>Figure S9</b> .....                  | S19 |
| <b>Figure S10</b> .....                 | S20 |
| <b>Figure S11</b> .....                 | S21 |
| <b>Figure S12</b> .....                 | S22 |
| <b>Figure S13</b> .....                 | S23 |
| <b>Figure S14</b> .....                 | S24 |
| <b>Figure S15</b> .....                 | S25 |
| <b>Figure S16</b> .....                 | S26 |
| <b>Figure S17</b> .....                 | S27 |

|                         |     |
|-------------------------|-----|
| <b>Figure S18</b> ..... | S28 |
| <b>Figure S19</b> ..... | S29 |
| <b>Figure S20</b> ..... | S30 |
| <b>Figure S21</b> ..... | S31 |
| <b>Figure S22</b> ..... | S32 |
| <b>Figure S23</b> ..... | S33 |
| <b>Figure S24</b> ..... | S34 |
| <b>Figure S25</b> ..... | S35 |
| <b>Figure S26</b> ..... | S36 |
| <b>Figure S27</b> ..... | S37 |
| <b>Figure S28</b> ..... | S38 |
| <b>Figure S29</b> ..... | S40 |
| <b>Table S1</b> .....   | S41 |
| <b>Table S2</b> .....   | S42 |
| <b>Table S3</b> .....   | S43 |
| <b>Table S4</b> .....   | S44 |
| <b>Table S5</b> .....   | S45 |
| <b>Table S6</b> .....   | S46 |
| <b>REFERENCES</b> ..... | S47 |

## Synthesis of Catalysts

Synthesis of TiO<sub>2</sub> nanotubes (NTs): The preparation of TiO<sub>2</sub> NTs was completed by a typical hydrothermal method. 2 g P25 powder and 70 mL of 10 mol/L NaOH solution were added into a Teflon autoclave and stirred for 6 h. After mixing evenly, the autoclave was placed into the oven at 130 °C for 24 h to conduct the hydrothermal reaction. After the hydrothermal reaction was completed, the transparent liquid in the upper layer of autoclaves was poured out. The white precipitation in the under layer was collected and washed with 0.1 mol/L HCl solution to ensure the pH of suspension solution equal to 1.6. At this point, the original large granular sediment gradually changed into fine particles. The suspension was then washed several times with deionized water until its pH was equal to 7. The excess aqueous solution was poured out and the white sediment was soaked into anhydrous ethanol at room temperature for 24 h. After the ethanol treatment was completed, the sediment was filtered, dried in an oven at 80 °C to obtain the TiO<sub>2</sub> NTs.

Synthesis of CuO-out-TiO<sub>2</sub> NTs: To study the confinement effect on the SCR performance and SO<sub>2</sub> tolerance with CuO-TiO<sub>2</sub> NTs, the CuO-out-TiO<sub>2</sub> NTs was synthesized. In details, 0.5 g ethanol treated TiO<sub>2</sub> NTs was immersed in superfluous xylene for 12 h to packing the tubular channels, followed by the addition of aqueous solution with 0.0756 g Cu(NO<sub>3</sub>)<sub>2</sub>·3H<sub>2</sub>O dissolved. Then a solution of NH<sub>4</sub>HCO<sub>3</sub> dissolved in aqueous ammonia (26-28%) was added to facilitate the extraction of NTs from xylene into the aqueous phase. After stirring for 6 h, a standing and layering

process for the solutions was followed. Then, the mixture was evaporated at 80 °C under stirring for 1 h. Subsequently, the mixture was centrifuged, washed (at least 3 times with deionized water), dried in an oven at 80 °C for 12 h, and calcined in a muffle furnace at 400 °C for 4 h in static air with a heating rate of 2 °C/min. The catalyst was designated as CuO-out-TiO<sub>2</sub> NTs for copper oxides supported outside TiO<sub>2</sub> NTs.

## Catalysts Characterization

The microstructure of the catalyst was observed using a transmission electron microscope (TEM, JEM-200CX) and a high-resolution transmission electron microscope (HRTEM, JEM-2100F). The X-ray Diffraction (XRD) diffraction pattern was obtained by X-ray diffractometer (3KW D/MAX2200V PC, Japan) with Cu K $\alpha$  (40 kV, 40 mA) radiation in the 2 $\theta$  range of 10° to 90° with a scan rate of 8°/min. The Raman spectra of catalysts was obtained by using Raman spectrometer (LabRAM HR Evolution, Horiba, France) with the laser at 532 nm as the excitation source. The UV-vis diffuse reflectance (UV-vis) spectra were recorded by the UV-vis spectrophotometer (UV-vis absorbance, Cary5000, 229 Agilent, USA). Additionally, BaSO<sub>4</sub> was used as a reference in the range of 200~900 nm at room temperature. X-ray photoelectron spectroscopy (XPS) system equipped with Al K $\alpha$  radiation (PHI-5300) could be applied to research the surface atomic valence of catalysts. and the binding energy was calibrated by the containment carbon peak (C 1s = 284.8 eV). The microstructure and element distribution of the catalyst was observed by HRTEM-EDX (JEOL JEM-2100F) at 200 kV. The chemical composition and atomic proportion of the materials were measured by Agilent 7700 inductively coupled plasma-atomic emission spectrometry (ICP-AES). Nitrogen adsorption–desorption tests were measured at 77 K by a nitrogen adsorption instrument (U.S. Quanta chrome ASAP 2020M), and the specific surface area was calculated by the Brunauer-Emmett-Teller (BET) method. The impurities adsorbed on the catalyst was removed by vacuum degassing effectively at 200 °C for

10 h before the BET tests. The redox performances of catalysts were obtained by the hydrogen temperature-programmed Reduction ( $H_2$ -TPR) which was conducted on a Micromeritics AutoChem 2950 II auto-adsorption apparatus with a thermal conductivity detector (TCD). Previously, 80 mg of each catalyst was treated under Ar atmosphere with a flow rate of 30 ml/min at 300 °C for 30 min, then cooled to room temperature under Ar atmosphere. Afterwards  $H_2$ -TPR program runed in which the catalysts were exposed to 10 %  $H_2$ /Ar and the reactor temperature raised from room temperature to 900 °C with a rate of 10 °C/min. The Micromeritics AutoChem 2920 II auto-adsorption apparatus was employed for  $NH_3$  temperature-programmed desorption experiments ( $NH_3$ -TPD) with a TCD and Mass spectrometer (OMNISTAR) to monitor the  $NH_3$ . Similarly, before the  $NH_3$ -TPD experiments, 80 mg of catalysts were outgassed under He protection (30 ml/min) at 300 °C for 30 min and then cooled to 100 °C. Then, samples were exposed to 4%  $NH_3$ /He for 1h at 100 °C, followed by purging for 1 h with He to remove the physically adsorbed  $NH_3$ . Finally, the temperature was raised to 900 °C with a ramping rate of 10 °C/min. The Tianjin XQ TP-5080 auto-adsorption apparatus equipped with a TCD monitor and Mass spectrometer (OMNISTAR) was employed for performing  $SO_2 + O_2$  temperature-programmed desorption mass spectra experiments ( $SO_2 + O_2$ -TPD-MS). Prior to the TPD experiments, 80 mg of catalysts were treated under He protection (30 mL/min) at 300 °C for 30 min, then cooled to 100 °C. Samples were exposed to 500 ppm  $SO_2 + 5\%$   $O_2/N_2$  for 1h at 30 °C, and purged by  $N_2$  for 1 h at the same temperature. Finally, the

temperature was raised to 900 °C with a ramping rate of 10 °C/min. And the Tianjin XQ TP-5080 auto-adsorption equipped with a TCD monitor and Mass spectrometer (OMNISTAR) was also used for performing temperature-programmed decomposition (TPDC) experiments. Prior to the TPDC experiments, 80 mg of sulfated catalysts were treated under He protection (30 mL/min) at 300 °C for 30 min, and then cooled to 100 °C. Samples were exposed to 1000 ppm NO + 5% O<sub>2</sub>/N<sub>2</sub> for 1 h at 30 °C, and purged by N<sub>2</sub> for 1 h at the same temperature. Finally, the temperature raised to 900 °C with a ramping rate of 10 °C/min.

*In situ* diffuse reflectance infrared Fourier transform spectroscopy (*in situ* DRIFTS) experiments were studied on a Nicolet 6700 spectrometer with a liquid nitrogen cooled mercury cadmium telluride (MCT) detector. All DRIFTS were collected in the wavenumber range of 4000 cm<sup>-1</sup> to 1000 cm<sup>-1</sup> in the Kubelka-Munk format, accumulating 64 scans per minute at 4 cm<sup>-1</sup> resolution. Prior to each test, each sample was pre-treated at 300 °C under N<sub>2</sub> flow for 0.5 h and then regulated to the target temperature to obtain a background spectrum which should be deducted from the sample spectra. Prior to collecting a sample spectrum, it was necessary to collect a background spectrum at the target temperature which needed to be deducted from the sample spectra. As for the adsorption of NH<sub>3</sub>, NO + O<sub>2</sub> or SO<sub>2</sub> + O<sub>2</sub> studies, after obtaining the background spectra at different temperatures, the catalysts were exposed to a flow of 1000 ppm of NH<sub>3</sub>, 1000 ppm NO + 5 vol% O<sub>2</sub> or 1000 ppm SO<sub>2</sub> + 5 vol% O<sub>2</sub> at 30 °C for 1 h. The desorption process then went on under a flow of N<sub>2</sub> and was



recorded at corresponding temperatures of background spectrum. Furthermore, for the transient reactions between 1000 ppm NO + 5 vol% O<sub>2</sub> (NH<sub>3</sub>) and pre-adsorbed 1000 ppm NH<sub>3</sub> (or NO + O<sub>2</sub>), after the same pretreatment, the catalysts were exposed to NH<sub>3</sub> (or NO + O<sub>2</sub>) for the adsorption. One hour later, the samples were switched to a flow of NO + O<sub>2</sub> (or NH<sub>3</sub>) and meanwhile the reaction process was recorded as a function of time. For the transient reactions between 1000 ppm NO + 100 ppm SO<sub>2</sub> + 5 vol% O<sub>2</sub> (NH<sub>3</sub>) and pre-adsorbed 1000 ppm NH<sub>3</sub> (or NO + SO<sub>2</sub> + O<sub>2</sub>), after the same pretreatment, the catalysts were exposed to NH<sub>3</sub> (NO + SO<sub>2</sub> + O<sub>2</sub>) for the adsorption. One hour later, the samples were switched to a flow of NO + SO<sub>2</sub> + O<sub>2</sub> (or NH<sub>3</sub>) and meanwhile the reaction process was recorded as a function of time.

## DFT calculations

To better understand the interaction between metal oxide catalysts and TiO<sub>2</sub> supports, periodic DFT calculations were performed with the Vienna *ab initio* simulation package (VASP).<sup>1</sup> The projector-augmented wave pseudopotentials<sup>2</sup> were used for the electrons-nucleus interactions, whereas the generalized gradient approximation (GGA) with the Perdew-Burke-Ernzerhof (PBE) functional was employed for the exchange-correlation of electrons.<sup>3</sup> An energy cutoff of 400 eV was selected for the plane wave basis. The van der Waals interaction was corrected using the DFT-D3 method of Grimme *et al.*<sup>4</sup> We set the k-point of the Brillouin zone to  $3 \times 3 \times 1$  for all calculations.<sup>5</sup> Based on Dudarev's approach,<sup>6</sup> the Hubbard correction was applied to the Ti 3d states in which a single parameter  $U_{\text{eff}}$  was chosen to be 5.0 eV. The criterions of the electron self-consistent energy and the force convergence were  $10^{-5}$  eV and  $0.03 \text{ eV/\AA}$ , respectively.

For Ti<sub>3</sub>H<sub>2</sub>O<sub>7</sub> (110) surface, a unit cell of  $9.47 \text{ \AA} \times 16.35 \text{ \AA} \times 25.62 \text{ \AA}$  containing a total of 96 atoms separated by a vacuum space of  $18 \text{ \AA}$  was employed. The adsorption energy of each metal oxide catalyst (MOC) on Ti<sub>3</sub>H<sub>2</sub>O<sub>7</sub> (110) surface was calculated

as:

$$E_{\text{ads}} = E_{\text{MOC/surface}} - (E_{\text{MOC}} + E_{\text{surface}})$$

where  $E_{\text{species/surface}}$  is the total energy of MOC/surface complex. And  $E_{\text{MOC}}$  and  $E_{\text{surface}}$  are the total energies of corresponding MOC and surface, respectively. The more negative value indicates the stronger interaction.

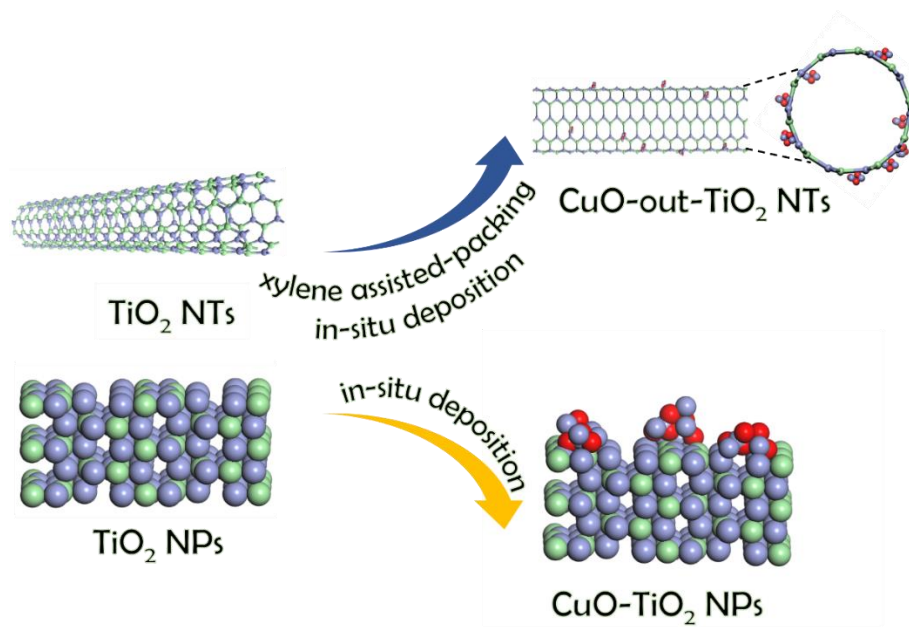

**Figure S1.** Schematic illustration of the synthesis procedure of CuO-TiO<sub>2</sub> NPs and CuO-out-TiO<sub>2</sub> NTs.

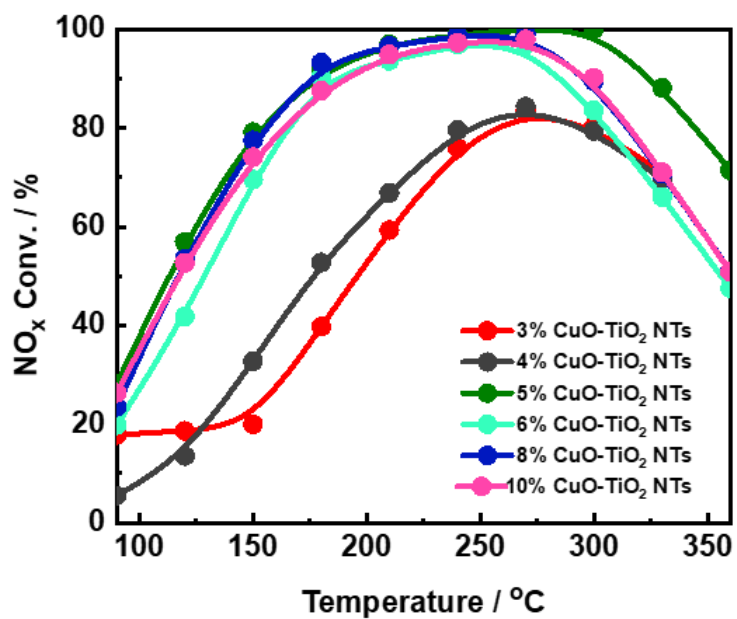

**Figure S2.** Plots of NO<sub>x</sub> conversion as a function of reaction temperature over CuO-TiO<sub>2</sub> NTs supported with different contents of CuO. Reaction conditions: 500 ppm of NO, 500 ppm of NH<sub>3</sub> and 5 vol% O<sub>2</sub>, N<sub>2</sub> as the balance gas, and GHSV of 50,000 h<sup>-1</sup>.

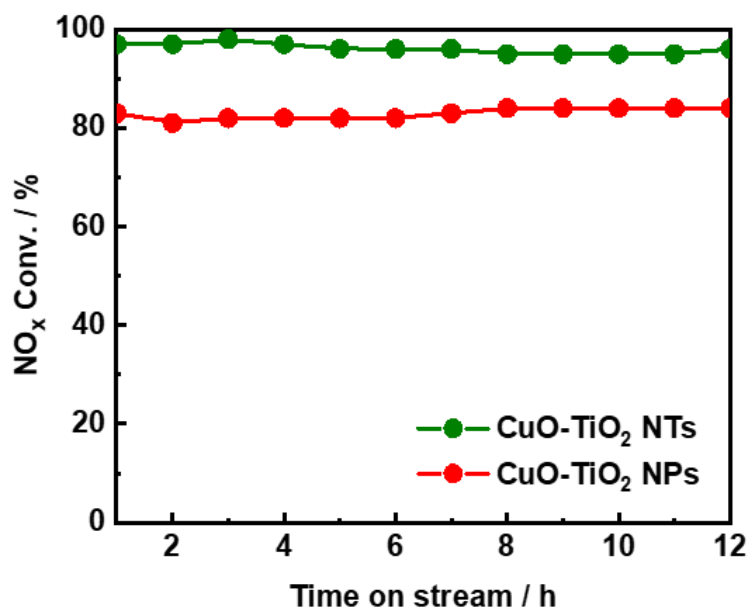

**Figure S3.** Plots of NO<sub>x</sub> conversion as a function of reaction time over CuO-TiO<sub>2</sub> NTs and CuO-TiO<sub>2</sub> NPs at 270 °C. Reaction conditions: 500 ppm of NO, 500 ppm of NH<sub>3</sub> and 5 vol% O<sub>2</sub>, N<sub>2</sub> as the balance gas, and GHSV of 50,000 h<sup>-1</sup>.

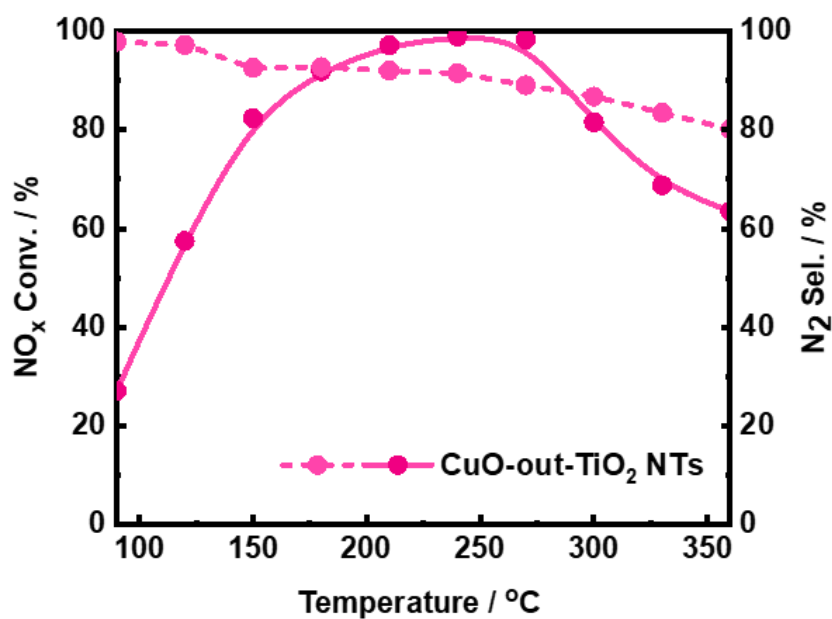

**Figure S4.** Plots of NO<sub>x</sub> conversion (solid line) and N<sub>2</sub> selectivity (dash line) as a function of reaction temperature over CuO-out-TiO<sub>2</sub> NTs. Reaction conditions: 270 °C, 500 ppm of NO, 500 ppm of NH<sub>3</sub> and 5 vol% O<sub>2</sub>, N<sub>2</sub> as the balance gas, and GHSV of 50,000 h<sup>-1</sup>.

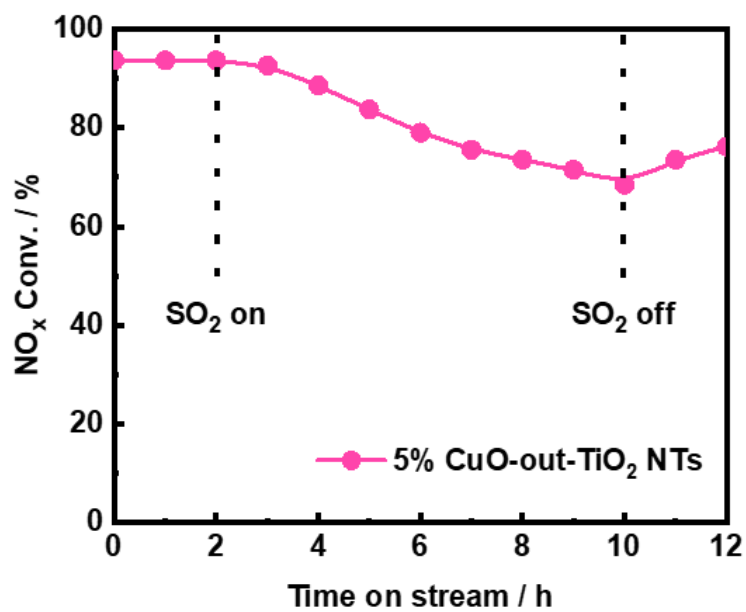

**Figure S5.** Plots of NO<sub>x</sub> conversion as a function of reaction time over CuO-out-TiO<sub>2</sub> NTs in the presence of SO<sub>2</sub>. Reaction conditions: 270 °C, 500 ppm of NO, 500 ppm of NH<sub>3</sub>, 5 vol% O<sub>2</sub>, 100 ppm of SO<sub>2</sub>, N<sub>2</sub> as the balance gas, and GHSV of 50,000 h<sup>-1</sup>.

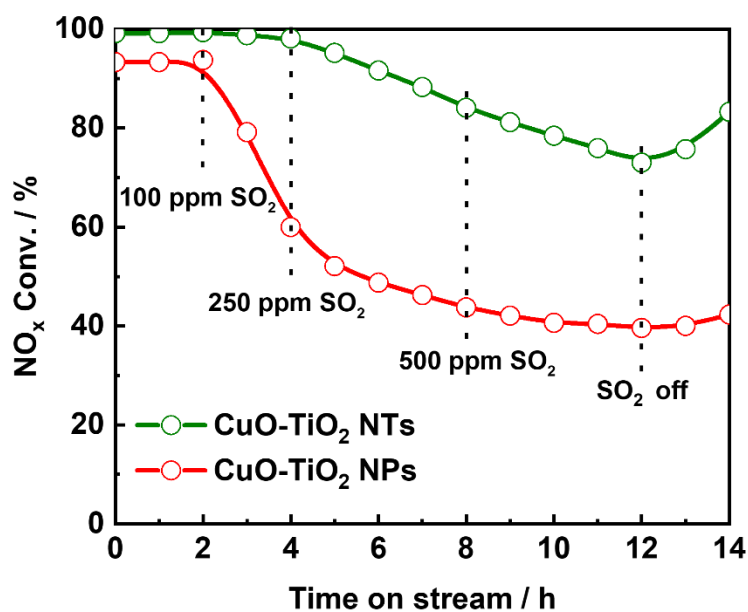

**Figure S6.** Plots of NO<sub>x</sub> conversion as a function of reaction time over CuO-TiO<sub>2</sub> NTs and CuO-TiO<sub>2</sub> NPs in the presence of SO<sub>2</sub>. Reaction conditions: 270 °C, 500 ppm of NO, 500 ppm of NH<sub>3</sub>, 5 vol% O<sub>2</sub>, 100, 250, 500 ppm of SO<sub>2</sub>, N<sub>2</sub> as the balance gas, and GHSV of 50,000 h<sup>-1</sup>.

Note: With SO<sub>2</sub> concentration increasing to 250 and 500 ppm, the NO<sub>x</sub> conversion of CuO-TiO<sub>2</sub> NTs decreased to 75% after introducing SO<sub>2</sub> for 10 h and recovered to 86% after removing SO<sub>2</sub> for 2 h. By comparison, the NO<sub>x</sub> conversion of CuO-TiO<sub>2</sub> NPs decreased to 39% after introducing SO<sub>2</sub> for 10 h and almost unchanged after removing SO<sub>2</sub> for 2 h.



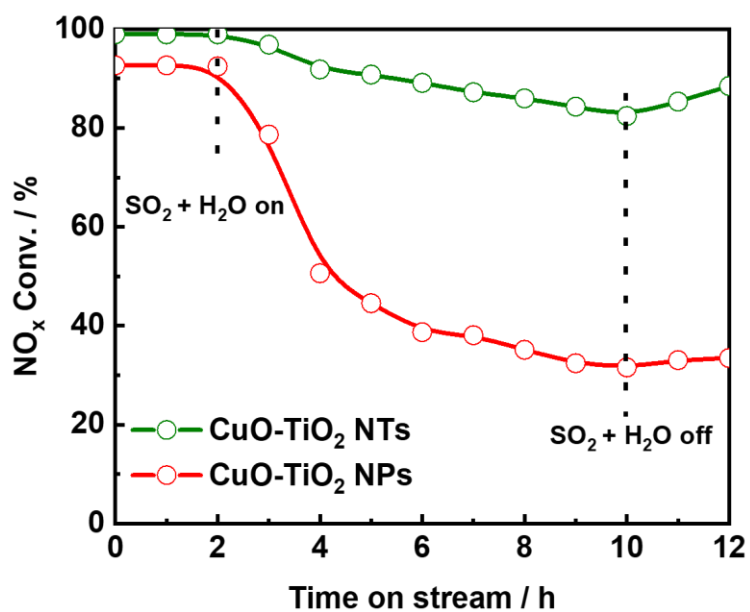

**Figure S7.** Plots of NO<sub>x</sub> conversion as a function of reaction time over CuO-TiO<sub>2</sub> NTs and CuO-TiO<sub>2</sub> NPs in the presence of SO<sub>2</sub> and H<sub>2</sub>O. Reaction conditions: 270 °C, 500 ppm of NO, 500 ppm of NH<sub>3</sub>, 5 vol% O<sub>2</sub>, 5 vol% H<sub>2</sub>O, 100 ppm of SO<sub>2</sub>, N<sub>2</sub> as the balance gas, and GHSV of 50,000 h<sup>-1</sup>.

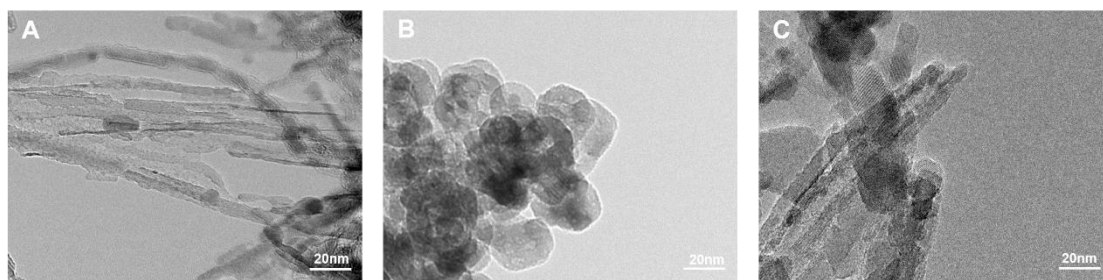

**Figure S8.** TEM images of (A) CuO-TiO<sub>2</sub> NTs, (B) CuO-TiO<sub>2</sub> NPs and (C) CuO-out-TiO<sub>2</sub> NTs.

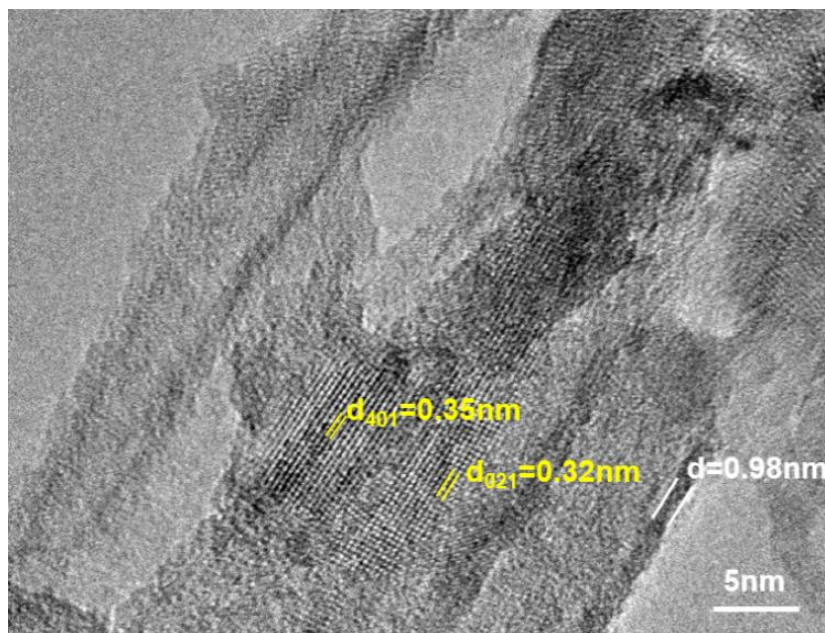

**Figure S9.** HRTEM image of CuO-TiO<sub>2</sub> NTs.

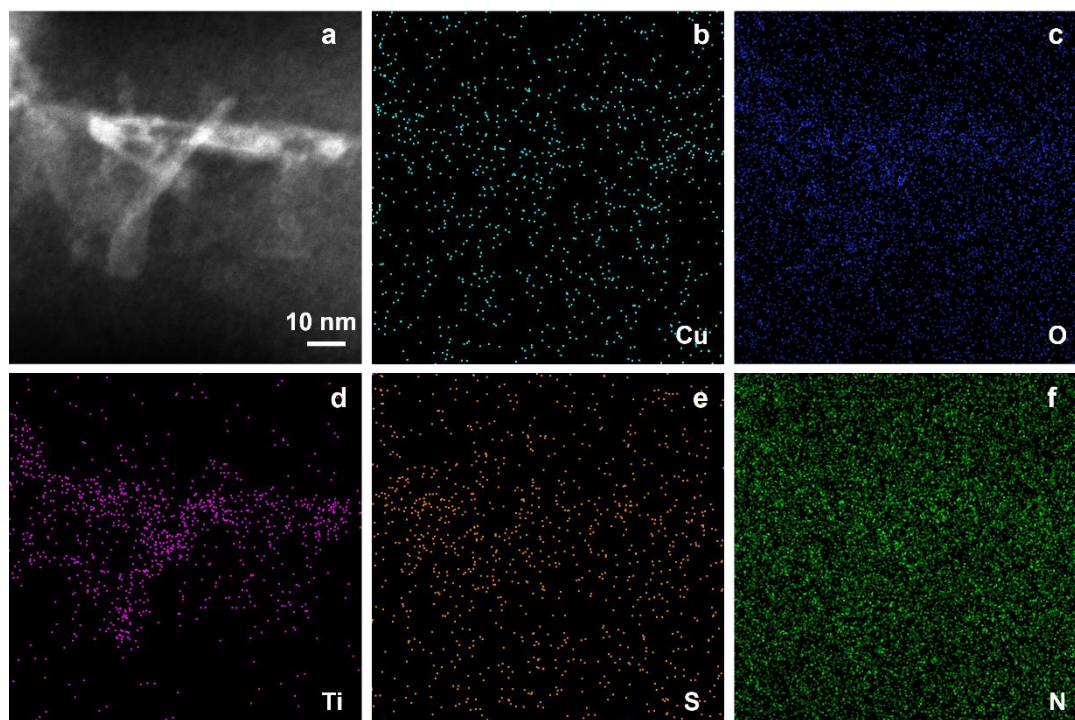

**Figure S10.** (a) STEM image and EDX mapping results of (b) Cu, (c) O, (d) Ti, (e) S, (f) N elements distribution for the CuO-TiO<sub>2</sub> NTs (s).

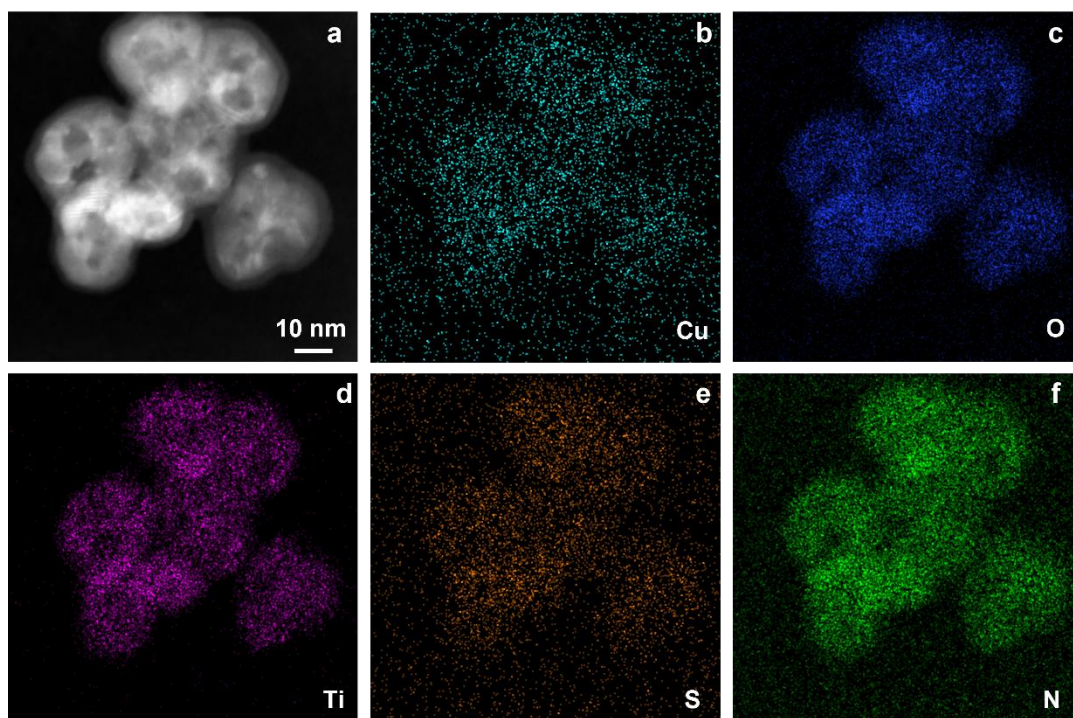

**Figure S11.** (a) STEM image and EDX mapping results of (b) Cu, (c) O, (d) Ti, (e) S, (f) N elements distribution for the CuO-TiO<sub>2</sub> NPs (s).

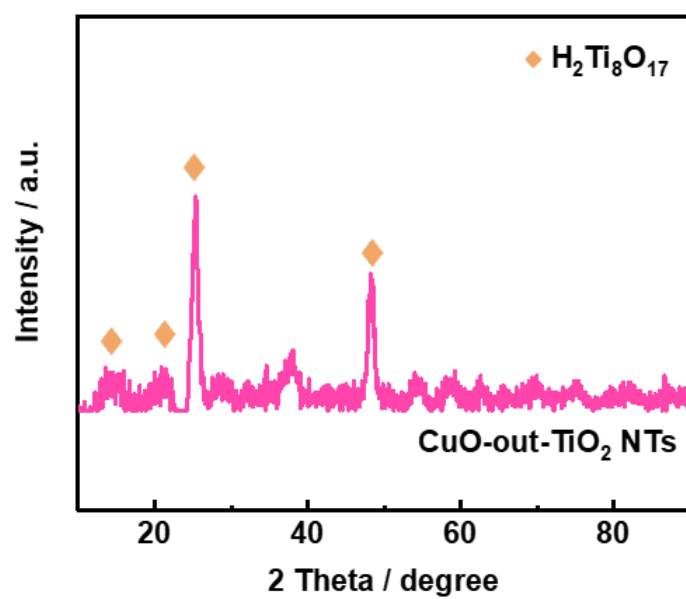

**Figure S12.** XRD patterns of CuO-out-TiO<sub>2</sub> NTs.

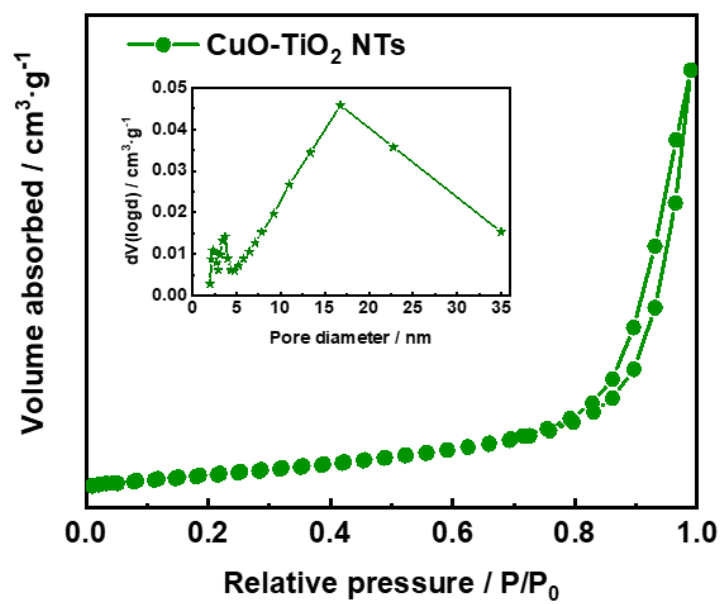

**Figure S13.** N<sub>2</sub> adsorption-desorption isotherm and BJH mesopore size distribution profiles (inset) of CuO-TiO<sub>2</sub> NTs.

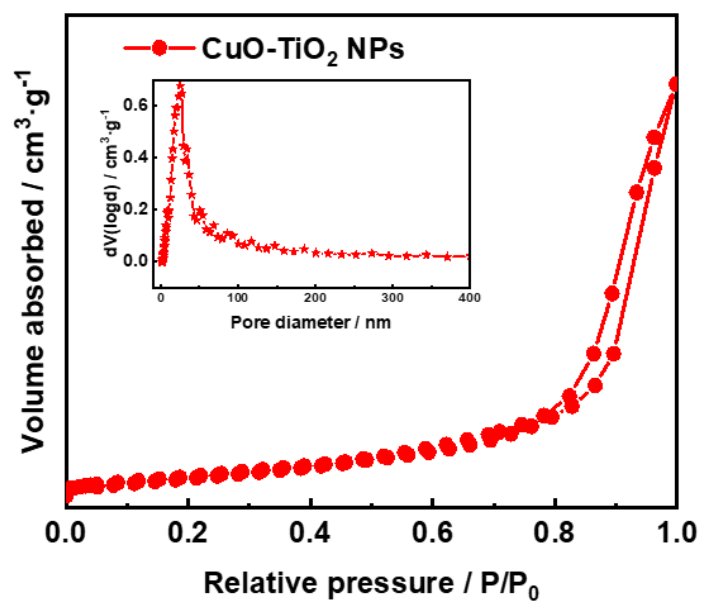

**Figure S14.** N<sub>2</sub> adsorption-desorption isotherm and BJH mesopore size distribution profiles (inset) of CuO-TiO<sub>2</sub> NPs.



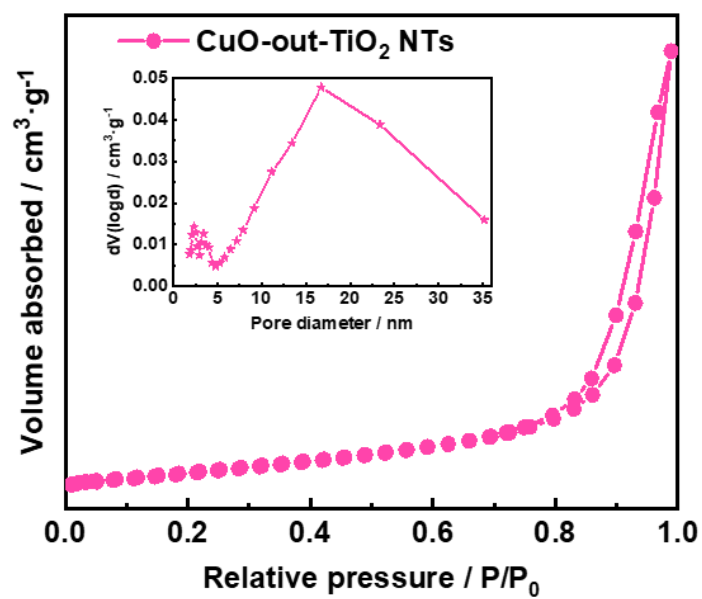

**Figure S15.** N<sub>2</sub> adsorption-desorption isotherm and BJH mesopore size distribution profiles (inset) of CuO-out-TiO<sub>2</sub> NTs.

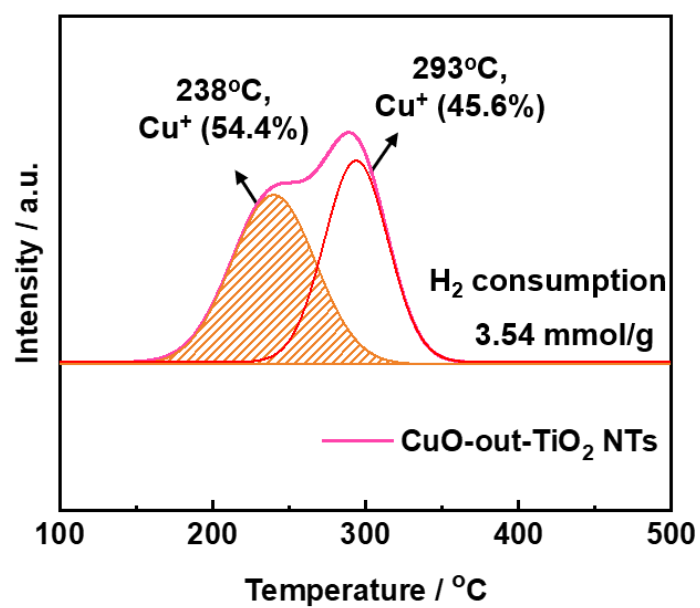

**Figure S16.** H<sub>2</sub>-TPR profile of CuO-out-TiO<sub>2</sub> NTs.

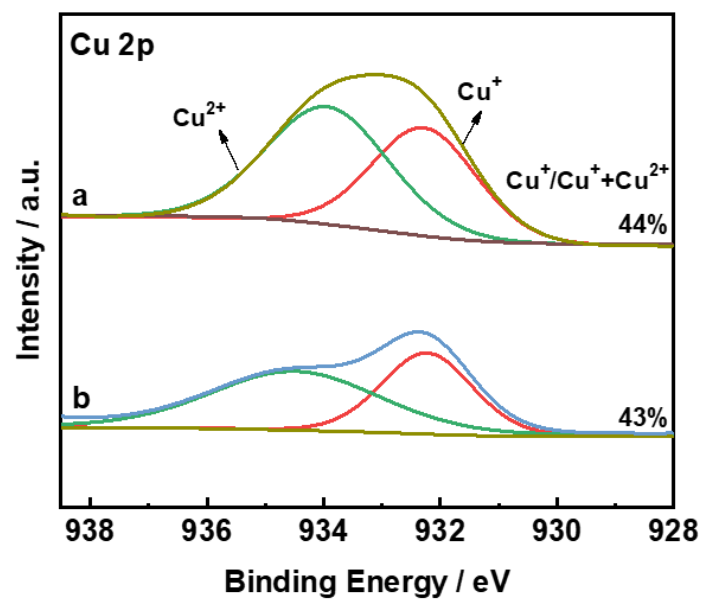

**Figure S17.** XPS spectra of Cu 2p over (a) CuO-out-TiO<sub>2</sub> NTs and (b) CuO-out-TiO<sub>2</sub> NTs (s).

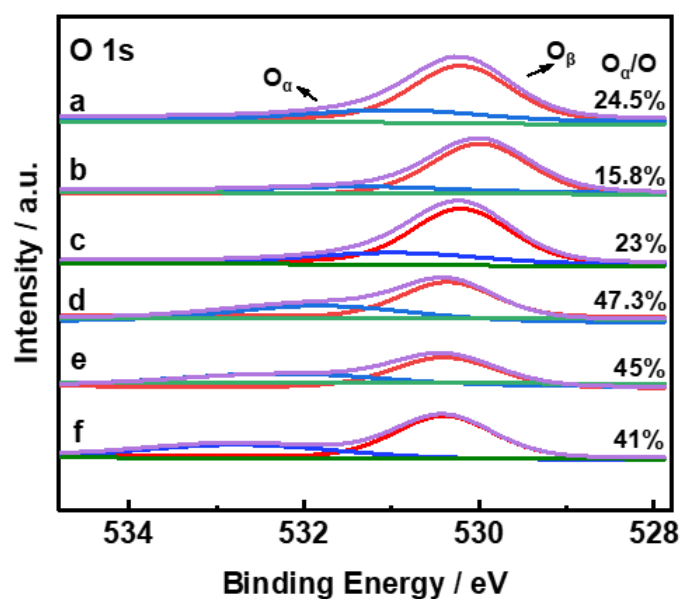

**Figure S18.** XPS spectra of O 1s over (a) CuO-TiO<sub>2</sub> NTs, (b) CuO-TiO<sub>2</sub> NPs, (c) CuO-out-TiO<sub>2</sub> NTs, (d) CuO-TiO<sub>2</sub> NTs (s), (e) CuO-TiO<sub>2</sub> NPs (s) and (f) CuO-out-TiO<sub>2</sub> NTs (s).

Note: In regard of the increase of  $O_{\alpha}/O_{\alpha}+O_{\beta}$  for CuO-out-TiO<sub>2</sub> NTs (s) was slightly less than that of CuO-TiO<sub>2</sub> NTs (s), one reasonable explanation was that the penetration depth of XPS is about 2-3 nm, which can detect oxygen containing species in the tubes. Owing to the sulfates species mainly deposited outside CuO-out-TiO<sub>2</sub> NTs (s), for CuO-out-TiO NTs (s), it could be liable that the oxygen derived from the formed sulfates species in the tubes were lower than that of CuO-TiO<sub>2</sub> NTs (s).

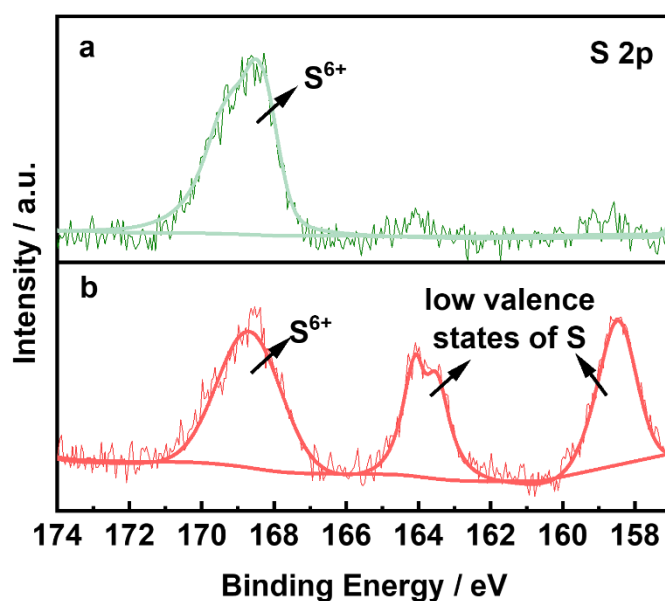

**Figure S19.** XPS spectra of S 2p over (a) CuO-TiO<sub>2</sub> NTs (s) and (b) CuO-TiO<sub>2</sub> NPs (s) catalysts.

Note: The peaks of binding energy at 166.0-171.0 eV were ascribed to S<sup>6+</sup> which derived from SO<sub>4</sub><sup>2-</sup>. Additionally, the peaks of binding energy at 157.0-161.0 eV and 161.0-166.0 eV were ascribed to the low valence state of S which generated by the high-energy electron bombard abundant S on the surface of CuO-TiO<sub>2</sub> NPs (s).<sup>7</sup> Owing to the quantity of sulfates species deposited on the surface of CuO-TiO<sub>2</sub> NPs (s) was much more than that of CuO-TiO<sub>2</sub> NTs (s), it would lead the surface sulfates to be more prone to facilitate the low valence state of S under the XPS electron bombardment.

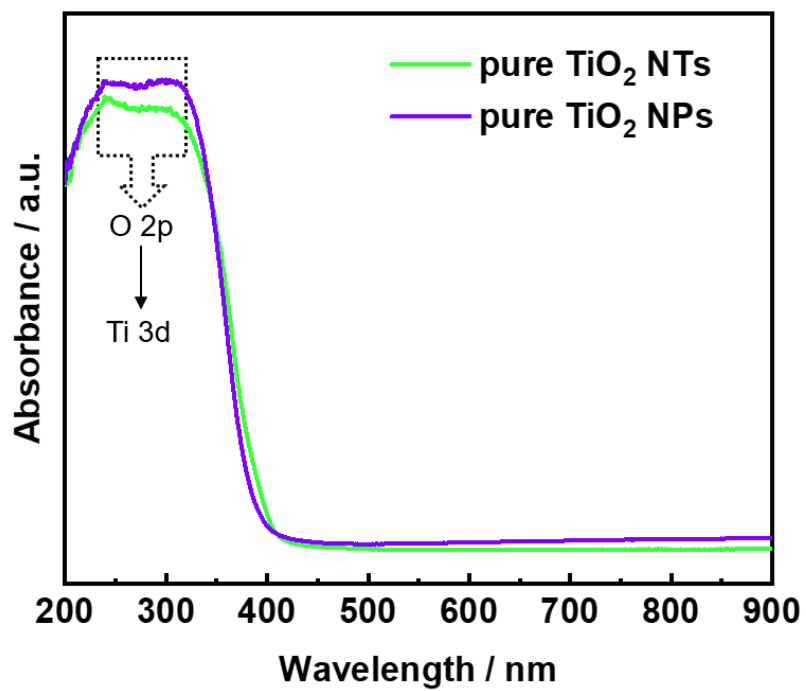

**Figure S20.** UV-vis absorption spectra of pure TiO<sub>2</sub> NTs and pure TiO<sub>2</sub> NPs.

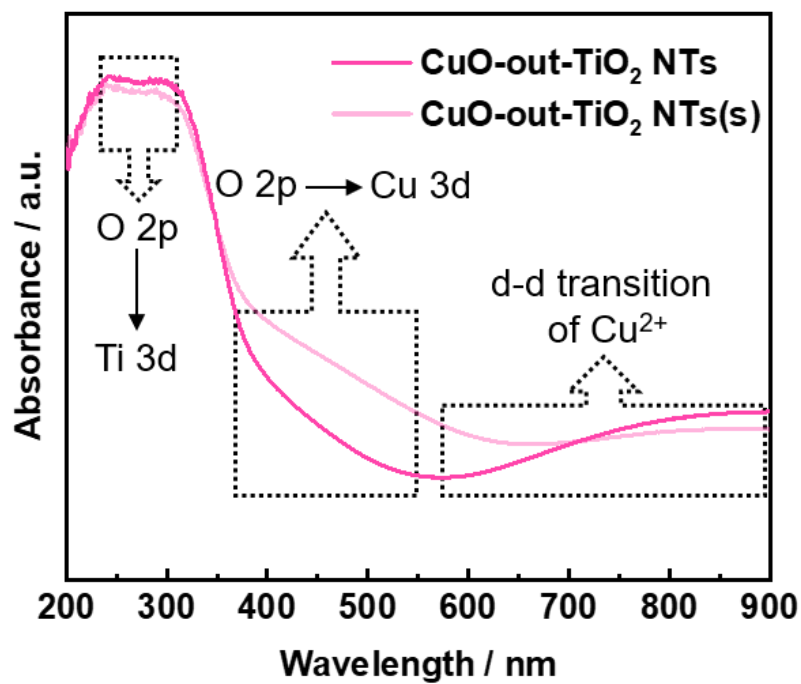

**Figure S21.** UV-vis absorption spectra of CuO-out-TiO<sub>2</sub> NTs and CuO-out-TiO<sub>2</sub> NTs

(s).

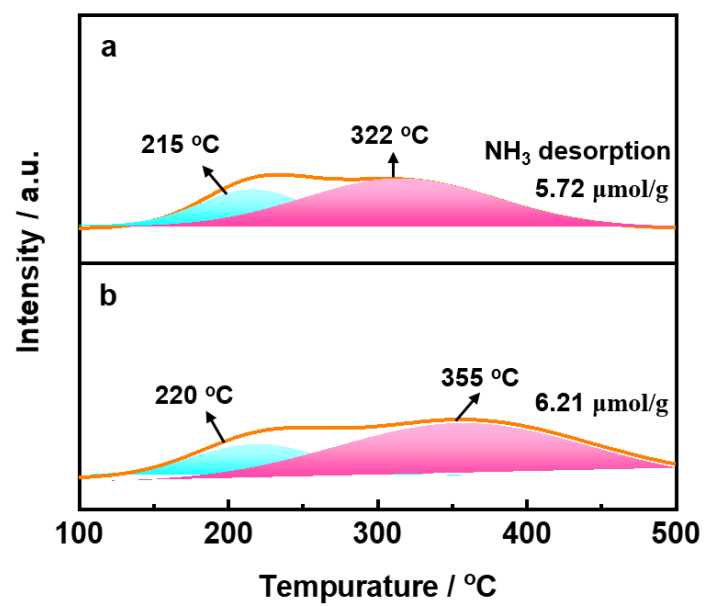

**Figure S22.** NH<sub>3</sub>-TPD-MS profiles of (a) pure TiO<sub>2</sub> NTs and (b) pure TiO<sub>2</sub> NPs.



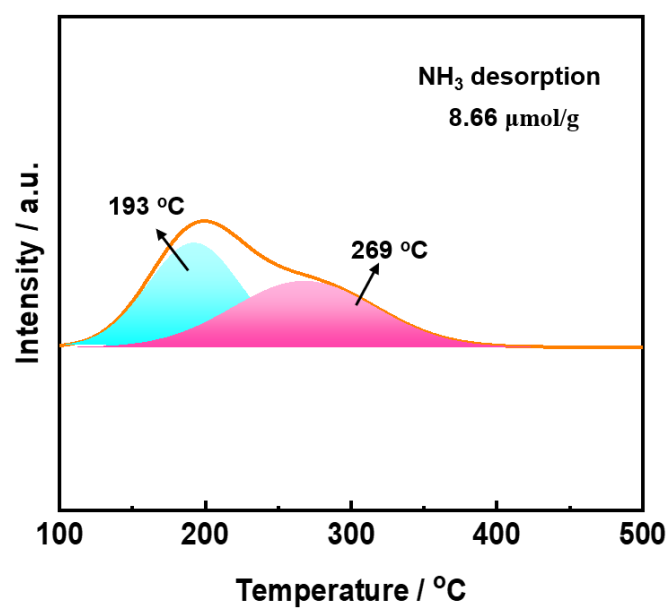

**Figure S23.** NH<sub>3</sub>-TPD-MS profiles of CuO-out-TiO<sub>2</sub> NTs.

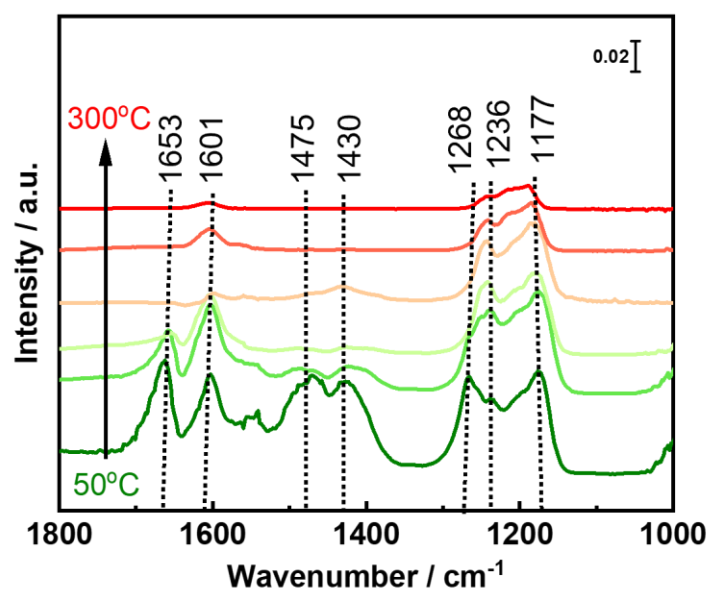

**Figure S24.** *In situ* DRIFTS of  $\text{NH}_3$  desorption after 1000 ppm  $\text{NH}_3$  pre-adsorbed for 1 h as a function of temperature over CuO-out-TiO<sub>2</sub> NTs.

Note: The peaks appearing at 1653  $\text{cm}^{-1}$ , 1475  $\text{cm}^{-1}$  and 1430  $\text{cm}^{-1}$  were attributed to the symmetric bending vibrations of N-H for the  $\text{NH}_4^+$  on Brønsted acid sites. Otherwise, the bands at 1601  $\text{cm}^{-1}$ , 1268  $\text{cm}^{-1}$ , 1236  $\text{cm}^{-1}$ , and 1177  $\text{cm}^{-1}$  were attributed to  $\text{NH}_3$  on Lewis acid sites.<sup>8-10</sup>

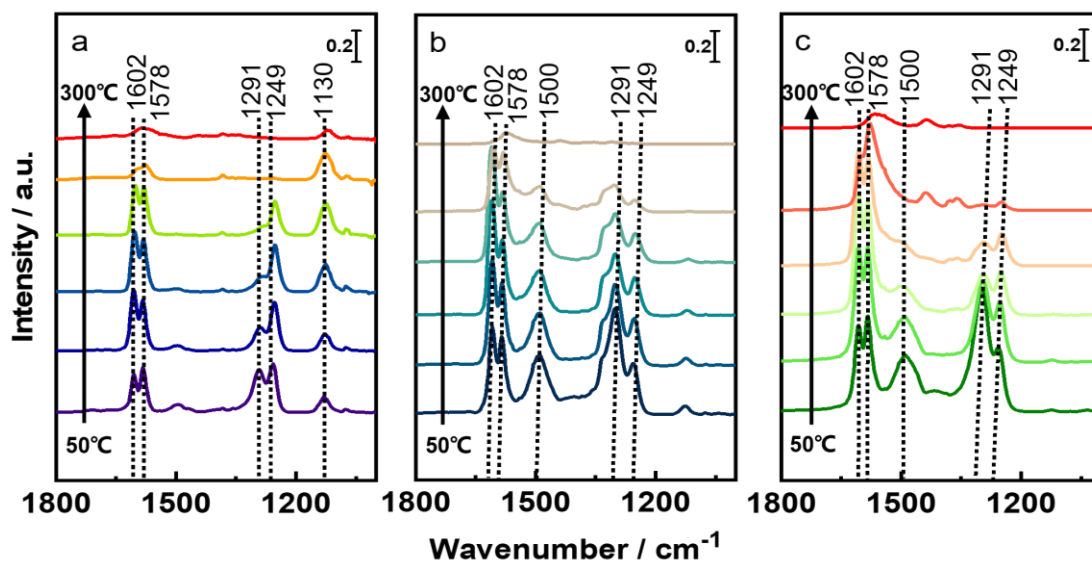

**Figure S25.** *In situ* DRIFTS of NO + O<sub>2</sub> desorption after 1000 ppm NO + 5 vol% O<sub>2</sub> pre-adsorbed for 1 h as a function of temperature over (a) CuO-TiO<sub>2</sub> NTs, (b) CuO-TiO<sub>2</sub> NPs and (c) CuO-out-TiO<sub>2</sub> NTs.

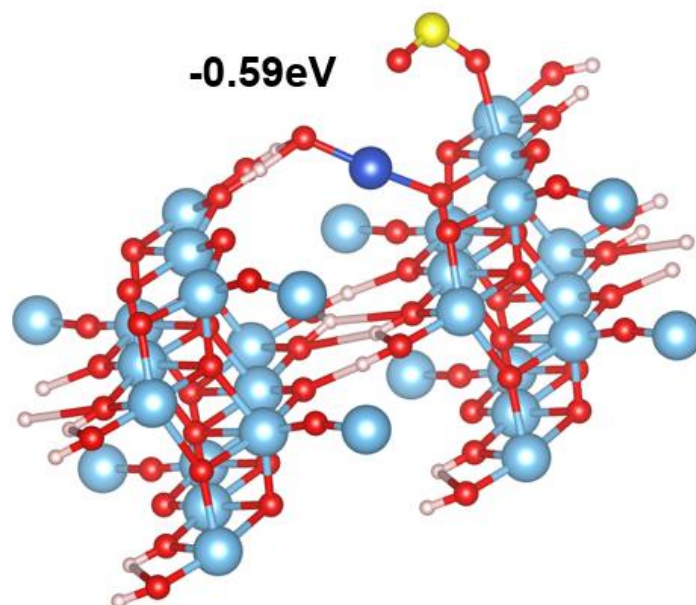

**Figure S26.** The most stable adsorption configuration for SO<sub>2</sub> adsorbed on the H<sub>2</sub>Ti<sub>3</sub>O<sub>7</sub> (110) sites on the CuO-TiO<sub>2</sub> NTs surface. Red, yellow, light blue, dark blue and white balls denote O, S, Ti, Cu and H atoms, respectively.

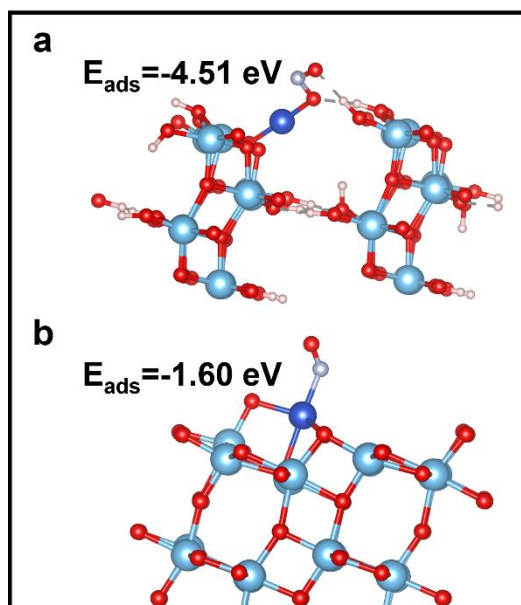

**Figure S27.** The most stable adsorption configuration for NO on isolated (a) CuO-TiO<sub>2</sub> NTs and (b) CuO-TiO<sub>2</sub> NPs surfaces. Grey, Red, light blue, dark blue and white balls denote N, O, Ti, Cu and H atoms, respectively.

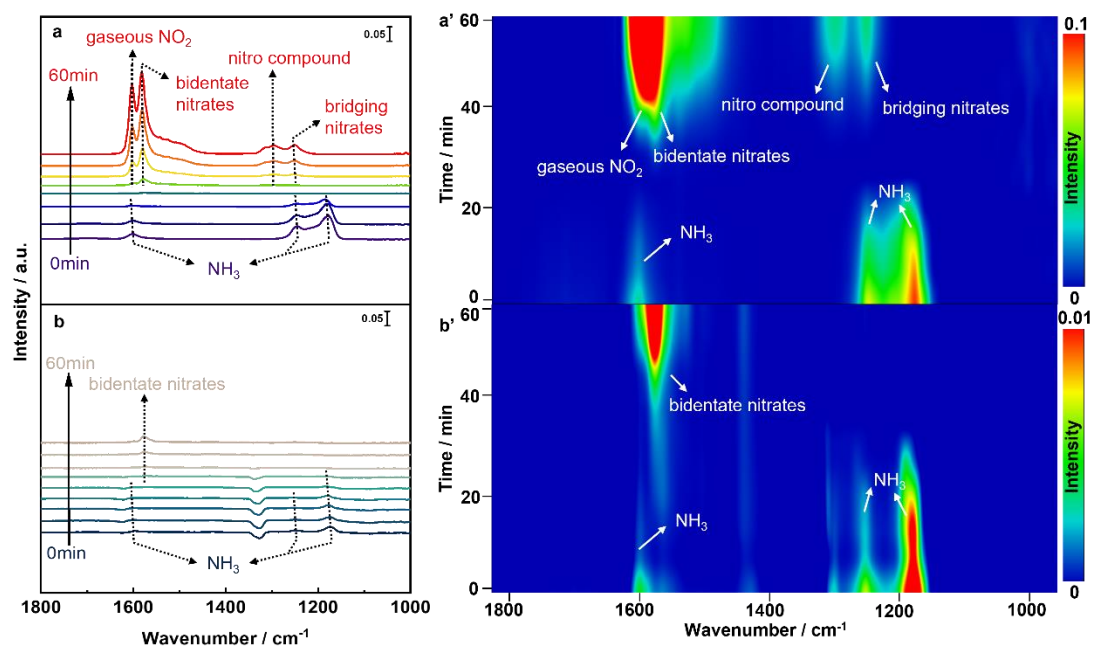

**Figure S28.** *In situ* DRIFTS and the corresponding mapping results of the transient reactions at 200 °C between 1000 ppm NO + 5 vol% O<sub>2</sub> and pre-adsorbed 1000 ppm NH<sub>3</sub> for 1 h as a function of time over (a, a') CuO-TiO<sub>2</sub> NTs and (b, b') CuO-TiO<sub>2</sub> NPs. Note: For the CuO-TiO<sub>2</sub> NTs, after the pre-adsorption of 1000 ppm NH<sub>3</sub> for 1 h, the band at 1180 cm<sup>-1</sup> was attributed to the asymmetric bending vibration of the N-H bond of NH<sub>3</sub> on the Lewis site. The bands presented at 1245 cm<sup>-1</sup> and 1601 cm<sup>-1</sup> were also associated with NH<sub>3</sub> on Lewis acid sites.<sup>11, 12</sup> With 1000 ppm NO + 5 vol% O<sub>2</sub> were introduced, the NH<sub>3</sub> on Lewis acid sites was gradually depleted within 30 min. In addition, the bands at 1602 cm<sup>-1</sup>, 1578 cm<sup>-1</sup>, 1293 cm<sup>-1</sup> and 1249 cm<sup>-1</sup> corresponded to gaseous NO<sub>2</sub>, bidentate nitrates, nitro compound and bridging species emerged, respectively.<sup>8</sup> The peak intensity of all adsorbed species gradually enhanced with the NO + O<sub>2</sub> introducing. In contrast, after the pre-adsorption of 1000 ppm NH<sub>3</sub> for 1 h, the quite weak bands at 1599 cm<sup>-1</sup>, 1250 cm<sup>-1</sup> and 1176 cm<sup>-1</sup> also corresponded to NH<sub>3</sub> on

Lewis acid sites appeared over the CuO-TiO<sub>2</sub> NPs catalyst, which further declared the weaker surface acidity and NH<sub>3</sub> adsorption on CuO-TiO<sub>2</sub> NPs. With the introduction of 1000 ppm NO + 5 vol% O<sub>2</sub>, the weak adsorbed NH<sub>3</sub> on Lewis acid sites vanished, with the weak peak at 1578 cm<sup>-1</sup> which belonged to split V<sub>3</sub> vibrations of bidentate nitrates was apparent gradually.<sup>13</sup>

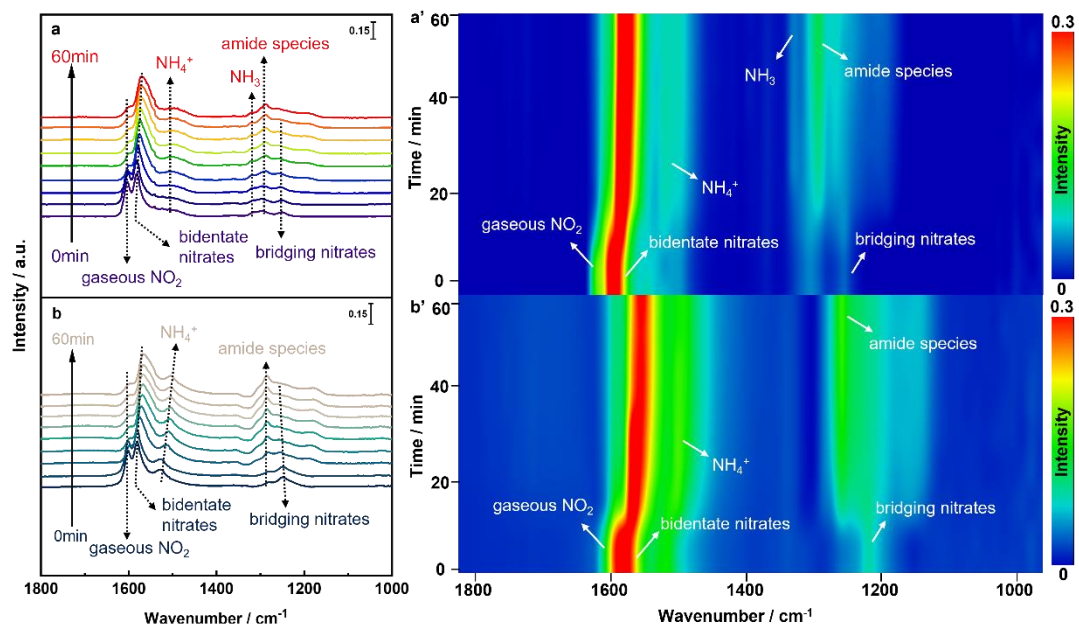

**Figure S29.** *In situ* DRIFTS and the corresponding mapping results of the transient reactions at 200 °C between 1000 ppm NH<sub>3</sub> and pre-adsorbed 1000 ppm NO + 5 vol% O<sub>2</sub> for 1 h as a function of time over (a, a') CuO-TiO<sub>2</sub> NTs and (b, b') CuO-TiO<sub>2</sub> NPs.



**Table S1.** The atomic fraction of N, S and Cu of CuO-TiO<sub>2</sub> NTs (s) and CuO-TiO<sub>2</sub> NPs (s) obtained from TEM-EDX mapping.

| Sample                       | Atomic fraction of S (%) | Atomic fraction of N (%) | Atomic fraction of Cu (%) |
|------------------------------|--------------------------|--------------------------|---------------------------|
| CuO-TiO <sub>2</sub> NTs (s) | 3.63                     | 8.19                     | 4.24                      |
| CuO-TiO <sub>2</sub> NPs (s) | 5.70                     | 8.39                     | 4.99                      |

**Table S2.** The textural properties of CuO-TiO<sub>2</sub> NTs, CuO-TiO<sub>2</sub> NPs, CuO-out-TiO<sub>2</sub> NTs, CuO-TiO<sub>2</sub> NTs (s), CuO-TiO<sub>2</sub> NPs (s) and CuO-out-TiO<sub>2</sub> NTs (s).

| Catalysts                        | Specific surface area (m <sup>2</sup> ·g <sup>-1</sup> ) | Pore volume (cm <sup>3</sup> ·g <sup>-1</sup> ) |
|----------------------------------|----------------------------------------------------------|-------------------------------------------------|
| CuO-TiO <sub>2</sub> NTs         | 270.6                                                    | 1.51                                            |
| CuO-TiO <sub>2</sub> NPs         | 68.0                                                     | 0.39                                            |
| CuO-out-TiO <sub>2</sub> NTs     | 286.8                                                    | 1.57                                            |
| CuO-TiO <sub>2</sub> NTs (s)     | 181.8                                                    | 0.41                                            |
| CuO-TiO <sub>2</sub> NPs (s)     | 76.4                                                     | 0.25                                            |
| CuO-out-TiO <sub>2</sub> NTs (s) | 124.5                                                    | 0.38                                            |

**Table S3.** The hydrogen consumption and the ratios of hydrogen consumption from different Cu reduction peaks of CuO-TiO<sub>2</sub> NTs, CuO-TiO<sub>2</sub> NPs and CuO-out-TiO<sub>2</sub> NTs.

| Sample                       | Hydrogen consumption of Cu <sup>+</sup> reduction (%) | Hydrogen consumption of Cu <sup>2+</sup> reduction (%) | Total hydrogen consumption (mmol/g) |
|------------------------------|-------------------------------------------------------|--------------------------------------------------------|-------------------------------------|
| CuO-TiO <sub>2</sub> NTs     | 67.2                                                  | 32.8                                                   | 3.62                                |
| CuO-TiO <sub>2</sub> NPs     | 49.2                                                  | 50.8                                                   | 2.07                                |
| CuO-out-TiO <sub>2</sub> NTs | 45.6                                                  | 54.4                                                   | 3.54                                |

**Table S4.** The atomic fraction of N and S of CuO-TiO<sub>2</sub> NTs (s) and CuO-TiO<sub>2</sub> NPs (s) catalysts obtained from XPS measurement.

| Sample                       | Atomic fraction of N (%) | Atomic fraction of S (%) |
|------------------------------|--------------------------|--------------------------|
| CuO-TiO <sub>2</sub> NTs (s) | 3.16                     | 3.65                     |
| CuO-TiO <sub>2</sub> NPs (s) | 2.84                     | 6.17                     |

Note: The atomic fraction of S on the surface of CuO-TiO<sub>2</sub> NPs (s) was 6.17%, much higher than that (3.65%) of CuO-TiO<sub>2</sub> NTs (s), which indicated that there were more sulfates species yielded on the surface of CuO-TiO<sub>2</sub> NPs (s) than that of CuO-TiO<sub>2</sub> NTs (s). Meanwhile, the atomic fraction of S on the surface of CuO-TiO<sub>2</sub> NTs (s) was about the same as the atomic fraction of N (3.16%). It indicated that most of sulfates species deposited on the surface of CuO-TiO<sub>2</sub> NTs (s) in the form of (NH<sub>4</sub>)<sub>2</sub>SO<sub>4</sub>/NH<sub>4</sub>HSO<sub>4</sub> species rather than CuSO<sub>4</sub>, which would decompose at lower temperature and express less poisoning effects on the catalyst activity. In contrast, the adsorption of SO<sub>2</sub> on the surface of CuO-TiO<sub>2</sub> NPs (s) generated more CuSO<sub>4</sub> species beyond that (NH<sub>4</sub>)<sub>2</sub>SO<sub>4</sub>/NH<sub>4</sub>HSO<sub>4</sub>, resulting in serious active sites poisoning and activity loss.

**Table S5.** The mass fraction of S among CuO-TiO<sub>2</sub> NTs (s) and CuO-TiO<sub>2</sub> NPs (s)

obtained from ICP measurement.

| Sample                       | Mass fraction of S (%) |
|------------------------------|------------------------|
| CuO-TiO <sub>2</sub> NTs (s) | 2.47                   |
| CuO-TiO <sub>2</sub> NPs (s) | 3.47                   |

**Table S6.** The NH<sub>3</sub> desorption amount and the ratio of ammonia desorption on different acid sites of CuO-TiO<sub>2</sub> NTs, CuO-TiO<sub>2</sub> NPs, CuO-out-TiO<sub>2</sub> NTs, pure NTs and pure NPs.

| Sample                       | Weak NH <sub>3</sub> desorption<br>(0~200 °C, %) | Medium-strong NH <sub>3</sub><br>desorption (>200 °C, %) | Total NH <sub>3</sub> desorption<br>(μmol/g) |
|------------------------------|--------------------------------------------------|----------------------------------------------------------|----------------------------------------------|
| CuO-TiO <sub>2</sub> NTs     | 38.3                                             | 61.7                                                     | 14.39                                        |
| CuO-TiO <sub>2</sub> NPs     | 34.6                                             | 65.4                                                     | 10.88                                        |
| CuO-out-TiO <sub>2</sub> NTs | 50.0                                             | 50.0                                                     | 8.66                                         |
| Pure NTs                     | 32.0                                             | 68.0                                                     | 5.72                                         |
| Pure NPs                     | 28.8                                             | 71.2                                                     | 6.21                                         |

## References

1. G. Kresse and J. Furthmüller, Efficient iterative schemes for ab initio total-energy calculations using a plane-wave basis set, *Phys. Rev. B*, 1996, **54**, 11169-11186.
2. G. Kresse and D. Joubert, From ultrasoft pseudopotentials to the projector augmented-wave method, *Phys. Rev. B*, 1999, **59**, 1758.
3. J. P. Perdew, K. Burke and M. Ernzerhof, Generalized gradient approximation made simple, *Phys. Rev. Lett.*, 1996, **77**, 3865.
4. S. Grimme, J. Antony, S. Ehrlich and H. Krieg, A consistent and accurate ab initio parametrization of density functional dispersion correction (DFT-D) for the 94 elements H-Pu, *J. Chem. Phys.*, 2010, **132**, 154104.
5. H. J. Monkhorst and J. D. Pack, Special points for brillouin-zone integrations, *Phys. Rev. B*, 1976, **13**, 5188.
6. S. Dudarev, G. Botton, S. Savrasov, C. Humphreys and A. Sutton, Electron-energy-loss spectra and the structural stability of nickel oxide: an LSDA+ U study, *Phys. Rev. B*, 1998, **57**, 1505.
7. R. Zhang, C. Sun, J. Kou, H. Zhao, D. Wei and Y. Xing, Enhancing the Leaching of Chalcopyrite Using Acidithiobacillus ferrooxidans under the Induction of Surfactant Triton X-100, *Minerals*, 2019, **9**, 11.
8. H. Hu, S. Cai, H. Li, L. Huang, L. Shi and D. Zhang, In situ DRIFTS investigation of the low-temperature reaction mechanism over Mn-doped Co<sub>3</sub>O<sub>4</sub> for the selective catalytic reduction of NO<sub>x</sub> with NH<sub>3</sub>, *J Phys. Chem. C*, 2015, **119**, 22924-22933.
9. L. Chen, Z. Si, X. Wu and D. Weng, DRIFT study of CuO-CeO<sub>2</sub>-TiO<sub>2</sub> mixed oxides for NO<sub>x</sub> reduction with NH<sub>3</sub> at low temperatures, *ACS Appl. Mater. Interfaces*, 2014, **6**, 8134-8145.
10. K. Zha, S. Cai, H. Hu, H. Li, T. Yan, L. Shi and D. Zhang, In situ DRIFTS investigation of promotional effects of tungsten on MnO<sub>x</sub>-CeO<sub>2</sub>/meso-TiO<sub>2</sub> catalysts for NO<sub>x</sub> reduction, *J Phys. Chem. C*, 2017, **12**, 25243-25254.
11. Q. Zhang, J. Fan, P. Ning, Z. Song, X. Liu, L. Wang, J. Wang, H. Wang and K. Long, In situ DRIFTS investigation of NH<sub>3</sub>-SCR reaction over CeO<sub>2</sub>/zirconium phosphate catalyst, *Appl. Surf. Sci.*, 2018, **435**, 1037-1045.
12. H. Liang, K. Gui and X. Zha, DRIFTS study of  $\gamma$ -Fe<sub>2</sub>O<sub>3</sub> nano-catalyst for low-temperature selective catalytic reduction of NO<sub>x</sub> with NH<sub>3</sub>, *Can. J. Chem. Eng.*, 2018, **94**, 1668-1675.
13. H. Hu, S. Cai, H. Li, L. Huang, L. Shi and D. Zhang, Mechanistic aspects of deNO<sub>x</sub> processing over TiO<sub>2</sub> supported Co-Mn oxide catalysts: structure-activity relationships and in situ DRIFTS analysis, *ACS Catal.*, 2015, **5**, 6069-6077.
